# Supplementary material for: Quantification of Lewy body pathology by cerebrospinal fluid endpoint dilution RT-QuIC in a neuropathological autopsy cohort of clinically heterogeneous participants
Source: Springer Nature journal article supplement (doi:10.1007/s00401-025-02904-4), 2025-06-23
Supplement: MOESM1 [file 401_2025_2904_MOESM1_ESM.pdf]

## **Quantification of Lewy Body pathology by cerebrospinal fluid Endpoint Dilution RT-QuIC in a neuropathological autopsy cohort of clinically heterogeneous participants**

Andrea Mastrangelo\*Serena Caldera\*, Sophie E. Mastenbroek, Erica Vittoriosi, Shorena Janelidze, Geidy E. Serrano, Alireza Atri, Holly Shill, Erika Driver-Dunckley, Shyamal Mehta, Charles H. Adler<sup>6</sup>, Angela Mammana, Franco Magliocchetti, Simone Baiardi, Thomas G. Beach, Oskar Hansson, Piero Parchi

\* Shared first authorship.

Correspondence to Piero Parchi:

Email: [piero.parchi@unibo.it](mailto:piero.parchi@unibo.it)

Phone number: +39-0514966740

### **SUPPLEMENTARY METHODS**

#### **Assessment of Alzheimer's disease pathology**

Alzheimer's disease neuropathologic changes (ADNC) were assessed in all LB-positive participants according to the National Institute on Aging-Alzheimer's Association (NIA-AA) criteria based on the Thal staging for A $\beta$  plaques, Braak staging for neurofibrillary tangles and CERAD neuritic plaque score. The Thal's staging information was unavailable in a subset of participants (n=43, 25.6%). However, in 35 (81.4%), the final classification according to NIA-AA criteria could be unequivocally deduced from the Braak staging and the CERAD score. In a minority of participants (n=8), the final classification of ADNC changes could not be retrieved without the appropriate Thal staging (i.e., most could be categorized either as "Not AD, or "Low ADNC" or "Intermediate ADNC"). These were then excluded from the analyses in which precise ADNC staging was required.

**Supplementary Table 1 – Neuropathological characteristics of whole LB-positive participants and stratified by neuropathological stage**

|                                                                                                         | AD low, n (%)  | AD intermediate, n (%) | AD high, n (%) | A $\beta$ Thal staging, n <sup>a</sup> | Tau Braak Staging, n <sup>a</sup> | TDP-43 pathology, n (%) |
|---------------------------------------------------------------------------------------------------------|----------------|------------------------|----------------|----------------------------------------|-----------------------------------|-------------------------|
| <b>LB-positive (n=168)</b>                                                                              | 17/160, (10.6) | 75/160 (46.9)          | 38/160 (23.7)  | 3.0<br>(1.0–4.0), 125                  | 4.0<br>(3.2–5.0), 168             | 26/72 (36.1)            |
| <ul style="list-style-type: none"> <li><i>Unified Staging System for Lewy Body Disorders</i></li> </ul> |                |                        |                |                                        |                                   |                         |
| <i>Olfactory bulb-only (n=8)</i>                                                                        | 0/7 (0.0)      | 3/7 (42.8)             | 2/7 (28.6)     | 3.0<br>(0.0–3.5), 5                    | 4.0<br>(4.0–4.7), 8               | 2/5 (40.0)              |
| <i>Brainstem predominant (n=30)</i>                                                                     | 2/29 (6.9)     | 15/29 (51.7)           | 3/29 (10.3)    | 2.0<br>(0.0–3.0), 25                   | 4.0<br>(3.0–4.0), 30              | 3/10 (30.0)             |
| <i>Limbic predominant (n=23)</i>                                                                        | 0/23 (0.0)     | 6/23 (26.1)            | 16/23 (69.6)   | 5.0<br>(3.5–5.0), 17                   | 5.0<br>(5.0–6.0), 23              | 7/14 (50.0)             |
| <i>Brainstem/Limbic (n=45)</i>                                                                          | 8/41 (19.5)    | 16/41 (39.0)           | 5/41 (12.2)    | 2.0<br>(0.0–3.0), 37                   | 4.0<br>(3.0–4.0), 45              | 6/16 (37.5)             |
| <i>Neocortical (n=62)</i>                                                                               | 7/60 (11.7)    | 35/60 (58.3)           | 12/60 (20.0)   | 3.0<br>(2.0–3.0), 41                   | 4.0<br>(3.0–5.0), 62              | 8/27 (29.6)             |
| <ul style="list-style-type: none"> <li><i>LP consensus criteria</i></li> </ul>                          |                |                        |                |                                        |                                   |                         |
| <i>Olfactory only (n=7)</i>                                                                             | 0/6 (0.0)      | 3/6 (50.0)             | 2/6 (33.3)     | 3.0<br>(0.7–3.7), 4                    | 4.0<br>(4.0–5.0), 7               | 2/4 (50.0)              |
| <i>Amygdala predominant (n=11)</i>                                                                      | 0/11 (0.0)     | 1/11 (9.1)             | 8/11 (72.7)    | 5.0<br>(2.2–5.0), 10                   | 6.0<br>(5.0–6.0), 11              | 3/9 (33.3)              |
| <i>Brainstem predominant (n=24)</i>                                                                     | 3/24 (12.5)    | 12/24 (50.0)           | 4/24 (16.7)    | 2.5<br>(0.7–4.0), 22                   | 4.0<br>(4.0–4.7), 24              | 3/11 (27.3)             |
| <i>Limbic (n=25)</i>                                                                                    | 1/24 (4.2)     | 11/24 (45.8)           | 7/24 (29.2)    | 3.0<br>(0.5–4.0), 17                   | 4.0<br>(3.5–5.0), 25              | 5/9 (55.5)              |
| <i>Neocortical (n=101)</i>                                                                              | 13/95 (13.7)   | 48/95 (50.5)           | 17/95 (17.9)   | 3.0<br>(1.0–3.0), 72                   | 4.0<br>(3.0–4.0), 101             | 13/39 (33.3)            |

a: expressed as median (interquartile range), number of participants with available data

Data on the staging of ADNC changes are available for 160 LB-positive participants. Data on the A $\beta$  Thal staging are available for 125 LB-positive participants. Abbreviations: AD, Alzheimer’s disease; LB, Lewy Body

**Supplementary Table 2 – Clinical and neuropathological characteristics of LB-positive/SAA-negative participants**

|     | <b>LB-density score</b> | <b>LB stage LPC</b>   | <b>LB stage USSLB</b> | <b>ADNC staging</b> | <b>Clinical diagnosis</b> | <b>Age at death</b> | <b>Sex</b> | <b>MMSE</b> | <b>UPDRS part III</b> | <b>UPSIT</b> |
|-----|-------------------------|-----------------------|-----------------------|---------------------|---------------------------|---------------------|------------|-------------|-----------------------|--------------|
| #1  | 1                       | Olfactory only        | I                     | High                | AD dementia               | 97                  | female     | n/a         | 19                    | 5            |
| #2  | 2                       | Olfactory only        | I                     | High                | AD dementia               | 86                  | male       | 18          | 6                     | 18           |
| #3  | 3                       | Olfactory only        | I                     | Intermediate        | MCI                       | 91                  | male       | 28          | 13                    | 25           |
| #4  | 1                       | Olfactory only        | I                     | Intermediate        | MCI                       | 97                  | female     | 24          | 22                    | 13           |
| #5  | 1                       | Brainstem predominant | IIa                   | Intermediate        | AD dementia               | 92                  | male       | 26          | 12                    | 19           |
| #6  | 1                       | Brainstem predominant | IIa                   | Not AD              | Vascular PK               | 86                  | male       | 16          | 71                    | 28           |
| #7  | 3                       | Brainstem predominant | IIa                   | Intermediate        | CU                        | 90                  | male       | 27          | 15                    | 11           |
| #8  | 1                       | Brainstem predominant | IIa                   | High                | AD dementia               | 80                  | male       | 5           | 50                    | 23           |
| #9  | 2                       | Brainstem predominant | IIa                   | Intermediate        | MCI                       | 101                 | female     | 20          | 5                     | 35           |
| #10 | 2                       | Brainstem predominant | IIa                   | Low                 | MCI                       | 96                  | male       | 27          | 14                    | 19           |
| #11 | 1                       | Brainstem predominant | IIa                   | Intermediate        | MCI                       | 92                  | female     | 28          | 27                    | 29           |
| #12 | 2                       | Brainstem predominant | IIa                   | Not AD              | FTD                       | 98                  | female     | 9           | 1                     | 34           |
| #13 | 4                       | Amygdala predominant  | IIb                   | High                | AD dementia               | 90                  | female     | 9           | 17                    | 13           |
| #14 | 4                       | Amygdala predominant  | IIb                   | High                | AD dementia               | 83                  | male       | 5           | 15                    | 12           |
| #15 | 4                       | Amygdala predominant  | IIb                   | Intermediate        | PSP                       | 82                  | male       | 25          | 4                     | 33           |
| #16 | 8                       | Amygdala predominant  | IIb                   | High                | AD dementia               | 85                  | female     | 18          | 2                     | 31           |
| #17 | 7                       | Amygdala predominant  | IIb                   | High                | AD dementia               | 78                  | female     | 5           | n/a                   | 15           |
| #18 | 6                       | Limbic                | III                   | Not AD              | PSP                       | 91                  | male       | 27          | 16                    | 18           |
| #19 | 6                       | Brainstem predominant | III                   | High                | AD dementia               | 90                  | male       | 1           | 37                    | 25           |

Abbreviations: AD, Alzheimer’s disease; ADNC, Alzheimer’s disease neuropathological changes; CU, clinically unimpaired; FTD, Frontotemporal dementia; LPC, Lewy Body Pathology consensus criteria; MCI, mild cognitive impairment; MMSE, Mini-Mental State Examination; n/a, not available; PSP, progressive supranuclear palsy; UPDRS, Unified Parkinson’s Disease Rating Scale; UPSIT, University of Pennsylvania Smell Identification Test; USSLB, Unified Staging System for Lewy Body Disorders;

**Supplementary Table 3– Clinical and neuropathological characteristics of LB-negative/SAA-positive participants**

|    | log <sub>10</sub> SD50 | ADNC staging | Clinical diagnosis | Age at death | Sex    | MMSE | UPDRS part III | UPSIT |
|----|------------------------|--------------|--------------------|--------------|--------|------|----------------|-------|
| #1 | 1.35                   | Intermediate | MCI                | 91           | female | 26   | 18             | 24    |
| #2 | 2.31                   | Intermediate | AD dementia        | 96           | female | 18   | 9              | 13    |
| #3 | 1.02                   | Not AD       | Vascular dementia  | 95           | male   | 26   | 34             | 24    |
| #4 | 2.20                   | Intermediate | CU                 | 87           | female | 30   | 0              | 27    |
| #5 | 1.11                   | High         | AD dementia        | 84           | male   | 21   | 15             | 15    |
| #6 | 1.36                   | Low          | MSA                | 70           | female | 29   | n/a            | 31    |

Abbreviations: AD, Alzheimer’s disease; ADNC, Alzheimer’s disease neuropathological changes; CU, clinically unimpaired; FTD, Frontotemporal dementia; MCI, mild cognitive impairment; MMSE, Mini-Mental State Examination; n/a, not available; PSP, progressive supranuclear palsy; UPDRS, Unified Parkinson’s Disease Rating Scale; UPSIT, University of Pennsylvania Smell Identification Test

**Supplementary Table 4 – LB-density scores and semiquantitative score values in the different sampled brain areas in the whole LB-positive/SAA-positive group and stratified by USSLB neuropathological stage**

|                         | LB-positive (n=149) | Olfactory bulb-only (n=4) | Brainstem predominant (n=22) | Limbic predominant (n=18) | Brainstem/limbic (n=43) | Neocortical (n=62)  | p value           |
|-------------------------|---------------------|---------------------------|------------------------------|---------------------------|-------------------------|---------------------|-------------------|
| <b>LB-density score</b> | 26.0<br>(14.0–32.5) | 2.5<br>(1.2–3.7)          | 10.0<br>(6.7–15.7)           | 9.5<br>(6.7–13.0)         | 23.0<br>(21.0–27.0)     | 33.0<br>(30.0–35.0) | <b>&lt;0.0001</b> |
| <b>OBT</b>              | 4.0<br>(3.0–4.0)    | 2.5<br>(1.2–3.0)          | 3.0<br>(2.0–4.0)             | 4.0<br>(3.7–4.0)          | 4.0<br>(3.0–4.0)        | 4.0<br>(4.0–4.0)    | <b>&lt;0.0001</b> |
| <b>ME</b>               | 4.0<br>(3.0–4.0)    | 0.0<br>(0.0–0.0)          | 3.0<br>(2.0–3.2)             | 0.5<br>(0.0–2.0)          | 4.0<br>(3.0–4.0)        | 4.0<br>(4.0–4.0)    | <b>&lt;0.0001</b> |
| <b>LC</b>               | 4.0<br>(3.0–4.0)    | 0.0<br>(0.0–0.0)          | 2.5<br>(1.0–3.0)             | 0.0<br>(0.0–1.0)          | 4.0<br>(3.0–4.0)        | 4.0<br>(4.0–4.0)    | <b>&lt;0.0001</b> |
| <b>SN</b>               | 3.0<br>(1.0–4.0)    | 0.0<br>(0.0–0.0)          | 1.0<br>(0.0–2.0)             | 0.0<br>(0.0–0.2)          | 3.0<br>(2.0–3.0)        | 3.5<br>(3.0–4.0)    | <b>&lt;0.0001</b> |
| <b>AMG</b>              | 4.0<br>(3.0–4.0)    | 0.0<br>(0.0–0.7)          | 1.0<br>(0.0–2.0)             | 3.5<br>(3.0–4.0)          | 4.0<br>(3.0–4.0)        | 4.0<br>(4.0–4.0)    | <b>&lt;0.0001</b> |
| <b>TRANS</b>            | 3.0<br>(1.0–4.0)    | 0.0<br>(0.0–0.0)          | 0.0<br>(0.0–1.0)             | 1.0<br>(0.0–2.0)          | 2.0<br>(2.0–3.0)        | 4.0<br>(3.0–4.0)    | <b>&lt;0.0001</b> |
| <b>CI</b>               | 2.0<br>(1.0–3.0)    | 0.0<br>(0.0–0.0)          | 0.0<br>(0.0–1.0)             | 0.0<br>(0.0–1.0)          | 2.0<br>(2.0–3.0)        | 4.0<br>(3.0–4.0)    | <b>&lt;0.0001</b> |
| <b>TC</b>               | 1.0<br>(0.0–2.0)    | 0.0<br>(0.0–0.0)          | 0.0<br>(0.0–0.0)             | 0.0<br>(0.0–0.0)          | 1.0<br>(1.0–1.0)        | 3.0<br>(2.0–3.0)    | <b>&lt;0.0001</b> |
| <b>FC</b>               | 1.0<br>(0.0–2.0)    | 0.0<br>(0.0–0.0)          | 0.0<br>(0.0–0.0)             | 0.0<br>(0.0–0.0)          | 1.0<br>(0.0–1.0)        | 2.0<br>(1.7–3.0)    | <b>&lt;0.0001</b> |
| <b>PC</b>               | 1.0<br>(0.0–2.0)    | 0.0<br>(0.0–0.0)          | 0.0<br>(0.0–0.0)             | 0.0<br>(0.0–0.0)          | 1.0<br>(0.0–1.0)        | 2.0<br>(1.0–2.0)    | <b>&lt;0.0001</b> |

P values of statistically significant comparisons are shown in bold.

Abbreviations: AMG, amygdala; CI, cingulate gyrus; FC, frontal cortex; LC, locus coeruleus; ME, medulla oblongata; SN, substantia nigra; OBT, olfactory bulb; PC, parietal cortex; TC, temporal cortex; TRANS, transentorhinal cortex

**Supplementary Table 5 – Associations between SD50 values and semiquantitative scoring of LB pathology in the different sampled brain areas in the whole LB-positive/SAA-positive group and stratified by USSLB neuropathological stage**

|              | LB-positive (n=149) |                   | Olfactory bulb-only (n=4) |         | Brainstem predominant (n=22) |               | Limbic predominant (n=18) |         | Brainstem/limbic (n=43) |         | Neocortical (n=62) |         |
|--------------|---------------------|-------------------|---------------------------|---------|------------------------------|---------------|---------------------------|---------|-------------------------|---------|--------------------|---------|
|              | Rho                 | p value           | Rho                       | p value | Rho                          | p value       | Rho                       | p value | Rho                     | p value | Rho                | p value |
| <b>OBT</b>   | 0.18                | <b>0.03</b>       | 0.95                      | 0.17    | 0.21                         | 0.34          | -0.05                     | 0.85    | -0.03                   | 0.82    | -0.08              | 0.54    |
| <b>ME</b>    | 0.57                | <b>&lt;0.0001</b> | -                         | -       | 0.66                         | <b>0.0008</b> | -0.04                     | 0.87    | 0.09                    | 0.58    | 0.06               | 0.65    |
| <b>LC</b>    | 0.59                | <b>&lt;0.0001</b> | -                         | -       | 0.52                         | <b>0.01</b>   | 0.13                      | 0.60    | 0.20                    | 0.19    | 0.08               | 0.51    |
| <b>SN</b>    | 0.57                | <b>&lt;0.0001</b> | -                         | -       | 0.34                         | 0.11          | 0.15                      | 0.54    | 0.29                    | 0.07    | 0.09               | 0.50    |
| <b>AMG</b>   | 0.37                | <b>&lt;0.0001</b> | -                         | -       | 0.59                         | 0.004         | -0.16                     | 0.52    | -0.13                   | 0.40    | 0.14               | 0.28    |
| <b>TRANS</b> | 0.51                | <b>&lt;0.0001</b> | -                         | -       | 0.32                         | 0.14          | 0.04                      | 0.87    | 0.07                    | 0.66    | 0.09               | 0.50    |
| <b>CI</b>    | 0.59                | <b>&lt;0.0001</b> | -                         | -       | 0.46                         | <b>0.03</b>   | 0.38                      | 0.11    | 0.23                    | 0.13    | -0.02              | 0.87    |
| <b>TC</b>    | 0.60                | <b>&lt;0.0001</b> | -                         | -       | 0.19                         | 0.38          | 0.21                      | 0.40    | 0.29                    | 0.06    | 0.10               | 0.42    |
| <b>FC</b>    | 0.54                | <b>&lt;0.0001</b> | -                         | -       | 0.21                         | 0.35          | 0.21                      | 0.40    | 0.07                    | 0.64    | 0.04               | 0.73    |
| <b>PC</b>    | 0.57                | <b>&lt;0.0001</b> | -                         | -       | 0.19                         | 0.38          | -                         | -       | 0.23                    | 0.14    | 0.07               | 0.58    |

P values of statistically significant associations are shown in bold.

Abbreviations: AMG, amygdala; CI, cingulate gyrus; FC, frontal cortex; LC, locus coeruleus; ME, medulla oblongata; SN, substantia nigra; OBT, olfactory bulb; PC, parietal cortex; TC, temporal cortex; TRANS, transentorhinal cortex

**Supplementary Table 6 - Last available scores at clinical scales in the whole LB-positive/SAA-positive group and stratified by neuropathological stage**

|                                                         | MMSE <sup>a</sup>        | UPDRS part III <sup>a</sup> | UPSIT <sup>a</sup>       | Dementia, n (%) |
|---------------------------------------------------------|--------------------------|-----------------------------|--------------------------|-----------------|
| <b>Whole LB-positive/SAA-positive (n=149)</b>           | 24.0<br>(17.0–27.0), 147 | 23.5<br>(7.0–42.0), 127     | 14.0<br>(10.0–19.0), 149 | 94<br>(63.1)    |
| • <i>Unified Staging System for Lewy Body Disorders</i> |                          |                             |                          |                 |
| <i>Olfactory bulb-only (Stage I) (n=4)</i>              | 28.5<br>(20.5–29.7), 4   | 13.0<br>(1.2–30.0), 4       | 22.5<br>(19.2–28.7), 4   | 1<br>(25.0)     |
| <i>Brainstem predominant (Stage IIa) (n=22)</i>         | 27.0<br>(26.5–29.0), 21  | 6.5<br>(3.0–14.5), 20       | 21.0<br>(15.7–27.5), 22  | 5<br>(22.7)     |
| <i>Limbic predominant (Stage IIb) (n=18)</i>            | 15.5<br>(6.7–24.0), 18   | 17.0<br>(4.0–50.1), 18      | 19.5<br>(12.0–26.7), 18  | 14<br>(77.8)    |
| <i>Brainstem/Limbic (Stage III) (n=43)</i>              | 25.0<br>(20.7–27.0), 42  | 19.0<br>(7.0–40.0), 35      | 13.0<br>(10.0–19.0), 43  | 24<br>(55.8)    |
| <i>Neocortical (Stage IV) (n=62)</i>                    | 19.0<br>(13.7–26.0), 62  | 34.5<br>(23.5–52.6), 50     | 11.0<br>(10.0–14.0), 62  | 50<br>(80.6)    |
| • <i>LP consensus criteria</i>                          |                          |                             |                          |                 |
| <i>Olfactory only (n=3)</i>                             | 28.0<br>(18.0–29.0), 3   | 21.0<br>(0.0–33.0), 3       | 20.0<br>(19.0–25.0), 3   | 1<br>(33.3)     |
| <i>Amygdala predominant (n=6)</i>                       | 15.5<br>(9.0–27.7), 6    | 16.5<br>(4.2–50.1), 6       | 30.0<br>(18.0–33.2), 6   | 4<br>(66.7)     |
| <i>Brainstem predominant (n=15)</i>                     | 27.0<br>(23.5–28.2), 14  | 6.0<br>(0.0–11.0), 15       | 23.0<br>(17.0–32.0), 15  | 4<br>(26.7)     |
| <i>Limbic (n=24)</i>                                    | 24.0<br>(18.0–27.0), 24  | 14.0<br>(4.0–39.0), 23      | 15.0<br>(12.0–23.2), 24  | 13<br>(54.2)    |
| <i>Neocortical (n=101)</i>                              | 23.0<br>(15.2–27.0), 100 | 31.5<br>(14.2–45.0), 80     | 11.0<br>(10.0–15.5), 101 | 72<br>(71.3)    |

a: expressed as median (interquartile range), participants with available data.

Abbreviations: LB, Lewy Bodies; LP, Lewy Pathology; MMSE, Mini-Mental State Examination; SAA, seed amplification assay; UPDRS, Unified Parkinson's Disease Rating Scale; UPSIT, University of Pennsylvania Smell Identification Test.

**Supplementary Table 7 - Clinical diagnoses in the whole LBD LB-positive/SAA-positive group and stratified by neuropathological stage**

|                                                         | Clinical diagnoses |           |             |          |           |                       |
|---------------------------------------------------------|--------------------|-----------|-------------|----------|-----------|-----------------------|
|                                                         | PD                 | DLB       | AD dementia | MCI      | CU        | Others                |
| <b>Whole LB-positive/SAA-positive (n=149)</b>           | 69 (46.3)          | 13 (8.7)  | 29 (19.5)   | 8 (5.4)  | 19 (12.7) | 11 (7.4)              |
| • <i>Unified Staging System for Lewy Body Disorders</i> |                    |           |             |          |           |                       |
| <i>Olfactory bulb-only (n=4)</i>                        | -                  | -         | 1 (25.0)    | -        | 3 (75.0)  | -                     |
| <i>Brainstem predominant (n=22)</i>                     | 4 (18.2)           | -         | 3 (13.6)    | 6 (27.3) | 9 (49.5)  | -                     |
| <i>Limbic predominant (n=18)</i>                        | 1 (5.5)            | -         | 10 (55.5)   | 1 (5.5)  | 2 (11.1)  | 4 (22.2) <sup>a</sup> |
| <i>Brainstem/Limbic (n=43)</i>                          | 24 (55.8)          | 4 (9.3)   | 7 (16.3)    | 1 (2.3)  | 5 (11.6)  | 2 (4.6) <sup>b</sup>  |
| <i>Neocortical (n=62)</i>                               | 40 (64.5)          | 9 (14.5)  | 8 (12.9)    | -        | -         | 5 (8.1) <sup>c</sup>  |
| • <i>LP consensus criteria</i>                          |                    |           |             |          |           |                       |
| <i>Olfactory only (n=3)</i>                             | -                  | -         | 1 (33.3)    | -        | 2 (66.7)  | -                     |
| <i>Amygdala predominant (n=6)</i>                       | -                  | -         | 4 (66.7)    | 1 (16.7) | 1 (16.7)  | -                     |
| <i>Brainstem predominant (n=15)</i>                     | -                  | -         | 4 (26.7)    | 2 (13.3) | 9 (60.0)  | -                     |
| <i>Limbic (n=24)</i>                                    | 5 (20.8)           | 1 (4.2)   | 6 (25.0)    | 4 (16.7) | 3 (12.5)  | 5 (20.8) <sup>d</sup> |
| <i>Neocortical (n=101)</i>                              | 64 (63.4)          | 12 (11.9) | 14 (13.9)   | 1 (1.0)  | 4 (4.0)   | 6 (5.9) <sup>e</sup>  |

a: include 2 participants with progressive supranuclear palsy, 1 participant with mixed dementia (vascular and degenerative) and 1 participant with not otherwise specified parkinsonism; b: include 2 participants with progressive supranuclear palsy; c: include 3 participants with mixed dementia (vascular and degenerative) and 2 participants with not otherwise specified parkinsonism; d: include 3 participants with progressive supranuclear palsy, 1 participant with mixed dementia (vascular and degenerative) and 1 participant with not otherwise specified parkinsonism; e: include 1 participant with progressive supranuclear palsy, 2 participants with not otherwise specified parkinsonism and 3 participants with mixed dementia (vascular and degenerative).

Abbreviations: AD, Alzheimer's Disease; CU, clinically unimpaired; DLB, Dementia with Lewy Bodies; MCI, mild cognitive impairment; LB, Lewy Bodies; LP, Lewy Pathology; MMSE, Mini-Mental State Examination; PD, Parkinson's Disease; SAA, seed amplification assay; UPDRS, Unified Parkinson's Disease Rating Scale; UPSIT, University of Pennsylvania Smell Identification Test.

**Supplementary Table 8 - Last available scores at clinical scales in the LB-positive/SAA-positive pure LBD group and stratified by clinical diagnoses**

|                             | LB-positive/SAA-positive, pure LBD<br>(n=43) | PD, pure LBD<br>(n=30) | DLB, pure LBD<br>(n=1) |
|-----------------------------|----------------------------------------------|------------------------|------------------------|
| MMSE <sup>a</sup>           | 27.0 (22.5–28.0), 42                         | 25.5 (20.7–27.2), 30   | -                      |
| UPDRS part III <sup>a</sup> | 24.50 (7.0-44.2), 32                         | 40.0 (27.0–47.0), 19   | 11, 1                  |
| UPSIT <sup>a</sup>          | 15.0 (10.0–19.0), 43                         | 12.5 (10.0–16.2), 30   | 8, 1                   |
| Dementia, n (%)             | 22 (51.2)                                    | 19 (63.3)              | 1 (100)                |

a: expressed as median (interquartile range), participants with available data.

Abbreviations: LB, Lewy Bodies; LP, Lewy Pathology; MMSE, Mini-Mental State Examination; SAA, seed amplification assay; UPDRS, Unified Parkinson’s Disease Rating Scale; UPSIT, University of Pennsylvania Smell Identification Test.

**Supplementary Table 9 - Clinical diagnoses in the LB-positive/SAA-positive pure LBD group and stratified by neuropathological stage**

|                                                            | Clinical diagnoses |         |                |          |          |                      |
|------------------------------------------------------------|--------------------|---------|----------------|----------|----------|----------------------|
|                                                            | PD                 | DLB     | AD<br>dementia | MCI      | CU       | Others               |
| <b>Whole LB-positive/SAA-positive, pure LBD<br/>(n=43)</b> | 30 (69.8)          | 1 (2.3) | 1 (2.3)        | 4 (9.3)  | 6 (13.9) | 1 (2.3)              |
| • <i>Unified Staging System for Lewy Body Disorders</i>    |                    |         |                |          |          |                      |
| <i>Olfactory bulb-only (n=2)</i>                           | -                  | -       | -              | -        | 2 (100)  | -                    |
| <i>Brainstem predominant (n=8)</i>                         | 2 (25.0)           | -       | -              | 3 (37.5) | 3 (37.5) | -                    |
| <i>Limbic predominant (n=1)</i>                            | -                  | -       | -              | 1 (100)  | -        | -                    |
| <i>Brainstem/Limbic (n=19)</i>                             | 16 (84.2)          | 1 (5.3) | -              | -        | 1 (5.3)  | 1 (5.3) <sup>a</sup> |
| <i>Neocortical(n=13)</i>                                   | 12 (92.3)          | -       | 1 (7.7)        | -        | -        | -                    |
| • <i>LP consensus criteria</i>                             |                    |         |                |          |          |                      |
| <i>Olfactory only (n=1)</i>                                | -                  | -       | -              | -        | 1 (100)  | -                    |
| <i>Amygdala predominant (n=2)</i>                          | -                  | -       | -              | 1 (50.0) | 1 (50.0) | -                    |
| <i>Brainstem predominant (n=5)</i>                         | -                  | -       | -              | 2 (40.0) | 3 (60.0) | -                    |
| <i>Limbic (n=5)</i>                                        | 3 (60.0)           | -       | -              | 1 (20.0) | 1 (20.0) | -                    |
| <i>Neocortical (n=30)</i>                                  | 27 (90.0)          | 1 (3.3) | 1 (3.3)        | -        | -        | 1 (3.3) <sup>a</sup> |

a: include 1 participant with progressive supranuclear palsy;

Abbreviations: AD, Alzheimer’s Disease; CU, clinically unimpaired; DLB, Dementia with Lewy Bodies; MCI, mild cognitive impairment; LB, Lewy Bodies; LP, Lewy Pathology; MMSE, Mini-Mental State Examination; PD, Parkinson’s Disease; SAA, seed amplification assay; UPDRS, Unified Parkinson’s Disease Rating Scale; UPSIT, University of Pennsylvania Smell Identification Test.

**Supplementary Table 10 - Associations between LB-density scores and scores at clinical scales in the whole LB-positive/SAA-positive group and stratified by clinical diagnoses and AD co-pathology**

|                                  | MMSE |       |              | UPDRS part III |      |                  | UPSIT |       |                  |
|----------------------------------|------|-------|--------------|----------------|------|------------------|-------|-------|------------------|
|                                  | n    | Rho   | p value      | n              | Rho  | p value          | n     | Rho   | p value          |
| <b>LB-positive/SAA positive</b>  |      |       |              |                |      |                  |       |       |                  |
| <i>Whole (n=149)</i>             | 147  | -0.23 | <b>0.004</b> | 127            | 0.47 | <b>&lt;0.001</b> | 149   | -0.50 | <b>&lt;0.001</b> |
| <i>Pure LBD (n=43)</i>           | 42   | -0.29 | 0.06         | 32             | 0.70 | <b>&lt;0.001</b> | 43    | -0.60 | <b>&lt;0.001</b> |
| <b>Parkinson's disease</b>       |      |       |              |                |      |                  |       |       |                  |
| <i>Whole (n=69)</i>              | 69   | -0.26 | <b>0.03</b>  | 49             | 0.32 | <b>0.02</b>      | 69    | -0.14 | 0.22             |
| <i>Pure LBD (n=30)</i>           | 30   | -0.27 | 0.14         | 19             | 0.46 | <b>0.04</b>      | 30    | -0.41 | <b>0.02</b>      |
| <b>Dementia with Lewy Bodies</b> |      |       |              |                |      |                  |       |       |                  |
| <i>Whole (n=13)</i>              | 12   | -0.27 | 0.39         | 12             | 0.49 | 0.10             | 13    | -0.53 | 0.06             |
| <i>Pure LBD (n=1)</i>            | 0    | -     | -            | 1              | -    | -                | 1     | -     | -                |

Abbreviations: LB, Lewy Bodies; LBD, Lewy Body disease; MMSE, Mini-Mental State Examination; PD, Parkinson's disease; SAA, seed amplification assay; UPDRS, Unified Parkinson's Disease Rating Scale; UPSIT, University of Pennsylvania Smell Identification Test

**Supplementary Table 11 - Associations between last available scores at clinical scales and LB-density score and semiquantitative scoring of LB pathology in the different sampled brain areas in the whole LB-positive/SAA-positive group**

|                         | MMSE<br>(n=147) |                  | UPDRS part III<br>(n=127) |                  | UPSIT<br>(n=149) |                  |
|-------------------------|-----------------|------------------|---------------------------|------------------|------------------|------------------|
|                         | Rho             | p value          | Rho                       | p value          | Rho              | p value          |
| <b>LB-density score</b> | -0.23           | <b>0.004</b>     | 0.47                      | <b>&lt;0.001</b> | -0.50            | <b>&lt;0.001</b> |
| <b>OBT</b>              | -0.24           | <b>0.003</b>     | 0.17                      | <b>0.05</b>      | -0.16            | <b>0.05</b>      |
| <b>ME</b>               | -0.02           | 0.77             | 0.32                      | <b>&lt;0.001</b> | -0.41            | <b>&lt;0.001</b> |
| <b>LC</b>               | -0.03           | 0.68             | 0.36                      | <b>&lt;0.001</b> | -0.46            | <b>&lt;0.001</b> |
| <b>SN</b>               | -0.03           | 0.74             | 0.45                      | <b>&lt;0.001</b> | -0.42            | <b>&lt;0.001</b> |
| <b>AMG</b>              | -0.35           | <b>&lt;0.001</b> | 0.38                      | <b>&lt;0.001</b> | -0.35            | <b>&lt;0.001</b> |
| <b>TRANS</b>            | -0.27           | <b>0.001</b>     | 0.40                      | <b>&lt;0.001</b> | -0.52            | <b>&lt;0.001</b> |
| <b>CI</b>               | -0.21           | <b>0.01</b>      | 0.41                      | <b>&lt;0.001</b> | -0.48            | <b>&lt;0.001</b> |
| <b>TC</b>               | -0.22           | <b>0.006</b>     | 0.48                      | <b>&lt;0.001</b> | -0.49            | <b>&lt;0.001</b> |
| <b>FC</b>               | -0.22           | <b>0.007</b>     | 0.42                      | <b>&lt;0.001</b> | -0.43            | <b>&lt;0.001</b> |
| <b>PC</b>               | -0.22           | <b>0.006</b>     | 0.47                      | <b>&lt;0.001</b> | -0.43            | <b>&lt;0.001</b> |

P values of statistically significant associations are shown in bold.

Abbreviations: AMG, amygdala; CI, cingulate gyrus; FC, frontal cortex; LC, locus coeruleus; ME, medulla oblongata; MMSE, Mini-Mental State Examination; OBT, olfactory bulb; PC, parietal cortex; SN, substantia nigra; TC, temporal cortex; TRANS, transentorhinal cortex; UPDRS, Unified Parkinson's Disease Rating Scale; UPSIT, University of Pennsylvania Smell Identification Test.

**Supplementary Table 12 - Time between available clinical scores and death in the whole LB-positive/SAA-positive group and stratified by clinical diagnoses**

|                                  | MMSE            | UPDRS part III  | UPSIT            |
|----------------------------------|-----------------|-----------------|------------------|
| <b>LB-positive/SAA positive</b>  |                 |                 |                  |
| <i>Whole (n=149)</i>             | 12.0 (7.0–22.2) | 11.0 (6.0–21.0) | 33.0 (19.5–50.5) |
| <i>Pure LBD (n=43)</i>           | 12.0 (7.0–23.0) | 11.5 (5.2–23.7) | 36.0 (23.0–48.0) |
| <b>Parkinson's disease</b>       |                 |                 |                  |
| <i>Whole (n=69)</i>              | 11.0 (7.0–18.0) | 11.0 (5.5–20.5) | 31.0 (16.5–48.5) |
| <i>Pure LBD (n=30)</i>           | 10.5 (6.7–19.0) | 10.0 (5.0–23.0) | 35.0 (22.5–55.7) |
| <b>Dementia with Lewy Bodies</b> |                 |                 |                  |
| <i>Whole (n=13)</i>              | 12.5 (8.7–17.7) | 9.5 (4.7–15.0)  | 34.0 (23.5–41.0) |
| <i>Pure LBD (n=1)</i>            | -               | 2.0             | 1.0              |
| <b>AD dementia</b>               |                 |                 |                  |
| <i>Whole (n=29)</i>              | 12.0 (8.0–31.0) | 10.5 (8.0–20.7) | 49.0 (23.5–65.0) |

Time is expressed in months and given as median (interquartile range)

Abbreviations: AD, Alzheimer's disease; LB, Lewy Bodies; LBD, Lewy Body disease; MMSE, Mini-Mental State Examination; SAA, seed amplification assay; UPDRS, Unified Parkinson's Disease Rating Scale; UPSIT, University of Pennsylvania Smell Identification Test.

**Supplementary Table 13 – Performance of SD50 and clinical variables, alone or in combination, in the identification of participants at a LPC neocortical stage in the whole LB-positive/SAA-positive group and stratified by clinical diagnoses**

|                                                     | Cut-off | AUC (95%CI)      | Sensitivity (95%CI) | Specificity (95%CI) |
|-----------------------------------------------------|---------|------------------|---------------------|---------------------|
| <b>Whole LB-positive/SAA-positive group (n=149)</b> |         |                  |                     |                     |
| <b>log<sub>10</sub>SD50 alone</b>                   | >3.3    | 0.86 (0.79–0.92) | 89.0 (82.0–94.0)    | 69.0 (55.0–80.0)    |
| <b>Dementia</b>                                     | -       | 0.63 (0.53–0.73) | 71.0 (62.0–79.0)    | 54.0 (40.0–67.0)    |
| <b>UPSIT score</b>                                  | <19     | 0.80 (0.72–0.88) | 88.0 (80.0–93.0)    | 58.0 (44.0–71.0)    |
| <b>log<sub>10</sub>SD50&gt;3.3 and dementia</b>     | -       | 0.78 (0.70–0.85) | 63.0 (54.0–72.0)    | 92.0 (80.0–97.0)    |
| <b>log<sub>10</sub>SD50&gt;3.3 and UPSIT&lt;19</b>  | -       | 0.79 (0.71–0.87) | 77.0 (68.0–84.0)    | 81.0 (68.0–90.0)    |
| <b>Dementia and UPSIT&lt;19</b>                     | -       | 0.71 (0.62–0.80) | 66.0 (57.0–75.0)    | 75.0 (61.0–85.0)    |
| <b>Alzheimer's disease dementia (n=29)</b>          |         |                  |                     |                     |
| <b>log<sub>10</sub>SD50 alone</b>                   | >2.0    | 0.96 (0.89–1.0)  | 93.0 (69.0–100)     | 87.0 (62.0–98.0)    |
| <b>Dementia</b>                                     | -       | -                | -                   | -                   |
| <b>UPSIT score</b>                                  | <15     | 0.83 (0.68–0.99) | 93.0 (69.0–100)     | 67.0 (42.0–85.0)    |
| <b>log<sub>10</sub>SD50&gt;2.0 and dementia</b>     | -       | 0.90 (0.77–1.0)  | 93.0 (69.0–100)     | 87.0 (62.0–98.0)    |
| <b>log<sub>10</sub>SD50&gt;2.0 and UPSIT&lt;15</b>  | -       | 0.90 (0.76–1.0)  | 86.0 (60.0–97.0)    | 93.0 (70.0–100)     |
| <b>Dementia and UPSIT&lt;15</b>                     | -       | 0.80 (0.63–0.97) | 93.0 (69.0–100)     | 67.0 (42.0–85.0)    |

Only statistically significant comparisons are shown. Analyses in the Parkinson's disease participants are not shown due to the low number of subjects with a neuropathological stage different from neocortical.

Abbreviations AUC, area under the curve; CI, confidence interval; LB, Lewy Bodies; LPC, Lewy Pathology consensus criteria; SAA, seed amplification assay; UPSIT, University of Pennsylvania Smell Identification Test.
